# Supplementary material for: Modelling oral up-take of hydrophobic and super-hydrophobic chemicals in fish
Source: Royal Society of Chemistry journal article supplement (doi:10.1039/c7em00495h), 2017-12-06
Supplement: c7em00495h2.xlsx [file c7em00495h2.xlsx]

## Sheet: Whole_Body_Data
Whole Body Size and Mass
	Body
Volume (ml) :	1.18488		whole body density
Mass (g) :	1.3		1.09716
Whole Body Composition
	Body
Storage Lipids (volume %) :	5.08853
Phospholipids (volume %) :	0.962135
Muscle Protein (volume %) :	10.7141
Albumin (volume %) :	0.265869
Other Proteins e.g. collagen (volume %) :	7.17663
Water (volume %) :	73.8233
Minerals (volume %) :	1.68558
Remainder (carbohydrates, etc.) :	0.283921
Whole Body Flags
	Body
Detail Level :	3
Growing :	0
Blood Amounts
	Total Blood Pool	Arterial Blood Pool	Venous Blood Pool
Volume (ml) :	0.0735235	0.00816927	0.0163385		blood density
Mass (g) :	0.078	0.00866667	0.0173333		1.06089
Blood Composition
	Blood Cells	Plasma	Blood
Storage Lipids (volume %) :	0	1.0323	0.7
Phospholipids (volume %) :	2.17459	0	0.7
Muscle Protein (volume %) :	37.4208	0	12.0458
Albumin (volume %) :	0	3.02941	2.05424
Other Proteins e.g. collagen (volume %) :	0	0	0
Water (volume %) :	59.8046	95.3383	83.9
Minerals (volume %) :	0.5	0.5	0.5
Remainder (carbohydrates, etc.) :	0.1	0.1	0.1
Blood Properties
Cardiac Output (mL/min.)	0.236198
Hematocrit (volume% of blood cells in blood)	32.19
Blood Flags
	Blood
Detail Level :	3
Growing :	0
Phase Properties
	Density (g/mL)		References
Storage lipid	0.918		density from Altman biology databook value for human depot fat
Phospholipid	1		density from Hinz 1986 thermodynamic data
Protein	1.36		density from Altman biology databook, values range from 1.33 to 1.39 for major proteins
Water	1		density assumed
Mineral	3.1		density for bone mineral (hydroxyapatite)
Remainder (e.g. carbohydrates, DNA)	1.2		density is approximate

## Sheet: Organ_Data
Whole Organ Size and Mass
	Low Perfused Organs :			Rich Perfused Organs :							Exchange Organs :
	Fat	Muscles	Skeleton	Kidney	Liver	Brain	Heart	Spleen	Gonads	Other Organs ("carcass")	Gills/Lungs	GIT	Skin
Volume (ml) :	0.0378462	0.773627	0.08	0.00889481	0.014632	0.00570419	0.00146258	0.00833369	0.00833369	0.0169709	0.0282844	0.038201	0.16
Mass (g) :	0.035	0.81874	0.132903	0.0092872	0.0155194	0.0059878	0.00154787	0.00890023	0.00890023	0.018	0.0301834	0.0405174	0.174338
Volume % of Whole Body :	3.19409	65.2915	6.75173	0.750692	1.23489	0.481414	0.123437	0.703335	0.703335	1.43229	2.3871	3.22404	13.5035
Whole Organ Composition
	Low Perfused Organs :			Rich Perfused Organs :							Exchange Organs :
	Fat	Muscles	Skeleton	Kidney	Liver	Brain	Heart	Spleen	Gonads	Other Organs ("carcass")	Gills/Lungs	GIT	Skin
Storage Lipids (volume %) :	94.0914	2.53626	1.80968	4.20831	2.07971	1.77698	2.53626	0.4956	0.4956	2.31076	0.588206	2.31076	2.72996
Phospholipids (volume %) :	0.739836	0.846651	0.830642	1.56617	2.86376	6.52506	0.846651	1.81984	1.81984	2.12128	2.15989	2.12128	0.653766
Muscle Protein (volume %) :	0.0679996	12.4507	6.10766	3.83866	3.89945	3.85926	12.4507	3.9264	3.9264	3.8994	3.92331	3.8994	12.0178
Albumin (volume %) :	0.0617997	0.176805	0.111016	0.174433	0.177196	0.175369	0.176805	0.17842	0.17842	0.177194	0.17828	0.177194	0.0728135
Other Proteins e.g. collagen (volume %) :	0.407998	2.02325	52.5259	6.90958	10.9185	7.71853	2.02325	12.5645	12.5645	10.9183	12.5546	10.9183	11.2166
Water (volume %) :	4.62398	81.3843	16.6128	82.3806	79.1246	78.729	81.3843	80.0987	80.0987	79.5478	80.0356	79.5478	72.677
Minerals (volume %) :	0	0.341391	21.4359	0.336811	0.342146	0.338619	0.341391	0.34451	0.34451	0.342141	0.344239	0.342141	0.351487
Remainder (carbohydrates, etc.) :	0.00702663	0.240585	0.566384	0.585395	0.594667	0.877211	0.240585	0.572077	0.572077	0.683046	0.215913	0.683046	0.280681
Organ Blood Flow and Content
	Low Perfused Organs :			Rich Perfused Organs :							Exchange Organs :
	Fat	Muscles	Skeleton	Kidney	Liver	Brain	Heart	Spleen	Gonads	Other Organs ("carcass")	Gills/Lungs	GIT	Skin
% of Cardiac Output:	8.50242	52	1.5	5.60386	2.89855	1	1	1.57464	1.57464	2	0	17.8459	4.5
Blood Content (mL)	0.000786159	0.0160701	0.0016618	0.00184767	0.00303942	0.0011849	0.000303814	0.000865556	0.000865556	0.00352528	0.00587536	0.00793529	0.00332359
	0.0378462	0.773627	0.08	0.0889481	0.14632	0.0570419	0.0146258	0.0833369	0.0833369	0.169709	0.282844	0.38201	0.16
Organ-Blood Interface
	Low Perfused Organs :			Rich Perfused Organs :							Exchange Organs :
	Fat	Muscles	Skeleton	Kidney	Liver	Brain	Heart	Spleen	Gonads	Other Organs ("carcass")	Gills/Lungs	GIT	Skin
Diffusion Area (cm²) :	0.877135	17.9298	1.8541	2.06149	3.39114	1.32202	0.338971	0.96572	0.96572	3.93323	6.55526	8.85357	3.7082
Capillar Radius (µm) :	5.97521	5.97521	5.97521	5.97521	5.97521	5.97521	5.97521	5.97521	5.97521	5.97521	5.97521	5.97521	5.97521
Krogh'scher Zylinder Radius (µm) :	431.476	431.476	431.476	43.1476	43.1476	43.1476	43.1476	86.2951	86.2951	43.1476	43.1476	43.1476	431.476
Membrane Thickness (Å) :	140	140	140	140	140	140	140	140	140	140	140	140	140
Water Layer Thickness (Å) :	2860	2860	2860	2860	2860	2860	2860	2860	2860	2860	2860	2860	2860
Organ Metabolism
	Low Perfused Organs :			Rich Perfused Organs :							Exchange Organs :
	Fat	Muscles	Skeleton	Kidney	Liver	Brain	Heart	Spleen	Gonads	Other Organs ("carcass")	Gills/Lungs	GIT	Skin
Metabolic Enzymes (mg/g-tissue)	0	0	0	0	135	0	0	0	0	0	0	0	0
Metabolic Cells (cells/g-tissue)	0	0	0	0	660000000	0	0	0	0	0	0	0	0
Organ Growth
	Low Perfused Organs :			Rich Perfused Organs :							Exchange Organs :
	Fat	Muscles	Skeleton	Kidney	Liver	Brain	Heart	Spleen	Gonads	Other Organs ("carcass")	Gills/Lungs	GIT	Skin
Linear (mL/day)
Organ-Scaled (volume %/day)
Body-Scaled (Organ=a*Body^b) a:
b:

## Sheet: Uptake_and_Excretion_Data
Organ-Exposure Media Interface
	Gills/Lungs	GIT	Skin
Diffusion Area (cm²) :	4.52354	2.73	12.2092
Membrane Thickness (Å) :	3678.85	9192.56	8567.54
Intracellular Water Layer Thickness (Å) :	136321	340634	952425
Extracellular Water Layer Thickness (Å) :	0	500000	0
Urinary Excretion
Glomerular Filtration (mL/min.)	0.00264725
Gas Exchange
Ventilation Rate (mL/min.)	0.821559
Feeding
Feeding Rate (g/day)	0.026

## Sheet: References
References
Nichols, J. W.; Schultz, I. R.; Fitzsimmons, P. N., In vitro-in vivo extrapolation of quantitative hepatic biotransformation data for fish - I. A review of methods, and strategies for incorporating intrinsic clearance estimates into chemical kinetic models. Aquatic Toxicology 2006, 78 (1), 74-90.
Nichols et al. A Physiologically Based Toxicokinetic Model for the Uptake and Disposition of Waterborne Organic Chemicals in Fish, Toxicology and Applied Pharmacology, 1990, 106, 433.
Barron et al. 1987 Temperature-dependence of cardiac output and regional blood flow in rainbow trout, Salmo gairdneri Richardson, J. Fish Biol., 31, 735.
McKim 1996 Dermal absorption of three waterborne chloroethanes in rainbow trout (Oncorhynchus mykiss) and channel catfish (Ictalurus punctatus)
Nichols 1996 A physiologically based toxicokinetic model for dermal absorption of organic chemicals by fish
Hughes 1986 PHYSIOLOGICAL SALINES AND THE MECHANICAL-PROPERTIES OF TROUT RED-BLOOD-CELLS
Nichols 2004 A physiologically based toxicokinetic model for dietary uptake of hydrophobic organic compounds by fish - I. Feeding studies with 2,2 ',5,5 '-tetrachlorobiphenyl.
Nichols, J. W.; Fitzsimmons, P. N.; Whiteman, F. W.; Kuehl, D. W.; Butterworth, B. C.; Jenson, C. T., Dietary uptake kinetics of 2,2 ',5,5 '-tetrachlorobiphenyl in rainbow trout. Drug Metab. Dispos. 2001, 29 (7), 1013-1022.
Escher 2011 Protein and Lipid Binding Parameters in Rainbow Trout (Oncorhynchus mykiss) Blood and Liver Fractions to Extrapolate from an in Vitro Metabolic Degradation Assay to in Vivo Bioaccumulation
Petersen, G. I.; Kristensen, P., Bioaccumulation of lipophilic substances in fish early life stages. Environ. Toxicol. Chem. 1998, 17 (7), 1385-1395.
Henderson, R. J.; Tocher, D. R., THE LIPID-COMPOSITION AND BIOCHEMISTRY OF FRESH-WATER FISH. Prog. Lipid. Res. 1987, 26 (4), 281-347.
Lee, R. F.; Phleger, C. F.; Horn, M. H., COMPOSITION OF OIL IN FISH BONES - POSSIBLE FUNCTION IN NEUTRAL BUOYANCY. Comparative Biochemistry and Physiology 1975, 50 (NB1), 13-16.
